# Supplementary material for: Association of CSF GAP-43 and APOE ε4 with Cognition in Mild Cognitive Impairment and Alzheimer’s Disease
Source: MDPI journal article supplement (doi:10.3390/cells12010013), 2022-12-21
Supplement: s1 [file s1]

## Supplementary Material

**Table S1.** The comparisons of CSF biomarkers diagnostic accuracy.

|                        | MCI $\epsilon$ 4+ | AD $\epsilon$ 4-        | AD $\epsilon$ 4+ |
|------------------------|-------------------|-------------------------|------------------|
| Variables              |                   | GAP-43                  |                  |
| A $\beta$ 42           | $P < 0.001$       | 0.023                   | $P < 0.001$      |
| T-tau                  | $P < 0.001$       | $P < 0.001$             | $P < 0.001$      |
| P-tau                  | $P < 0.001$       | 0.047                   | $P < 0.001$      |
| Variables              |                   | GAP-43 and A $\beta$ 42 |                  |
| T-tau and A $\beta$ 42 | 0.007             | 0.012                   | 0.028            |
| P-tau and A $\beta$ 42 | 0.071             | 0.905                   | 0.127            |

CSF: cerebrospinal fluid; CN: cognitively normal; MCI: mild cognitive impairment; AD: Alzheimer's disease; GAP-43: growth-associated protein 43; A $\beta$ : amyloid- $\beta$ ; T-tau: total tau; P-tau: phosphorylated tau.
